# Supplementary material for: Assessment of the Potential to Use the Expelled Heat Energy from a Typical Data Centre in Ireland for Alternative Farming Methods
Source: MDPI journal article supplement (doi:10.3390/en16186704), 2023-09-19
Supplement: s1 [file s1]

**Table S1.** List of Irish data centres calculated mass flow rate of circulating air, the resulting volumetric flow rate of air available to a vertical farm at ideal temperatures, and the ideal size of the vertical farm depending on this flow rate.

| Code            | Waste heat energy (kJ) | Waste heat energy per area (J.m <sup>-2</sup> ) | Mass flow rate (kg.s <sup>-1</sup> ) | Volumetric flow rate of air in data centre (m <sup>3</sup> .s <sup>-1</sup> ) | Ideal size of vertical farm (m <sup>2</sup> ) |
|-----------------|------------------------|-------------------------------------------------|--------------------------------------|-------------------------------------------------------------------------------|-----------------------------------------------|
| I1              | 15750                  | 760.23                                          | 1627.72                              | 1,352.29                                                                      | 6,049.71                                      |
| I2              | 3600                   | 322.92                                          | 372.05                               | 309.09                                                                        | 1,382.79                                      |
| I3              | 1440                   | 140.91                                          | 148.82                               | 123.64                                                                        | 553.12                                        |
| I4              | 8100                   | 726.56                                          | 837.11                               | 695.46                                                                        | 3,111.28                                      |
| I5              | 5175                   | 618.93                                          | 534.82                               | 444.32                                                                        | 1,987.76                                      |
| I6              | 4500                   | 403.66                                          | 465.06                               | 386.37                                                                        | 1,728.49                                      |
| I7              | 4500                   | 562.50                                          | 465.06                               | 386.37                                                                        | 1,728.49                                      |
| I8              | 15750                  | 1,093.75                                        | 1627.72                              | 1,352.29                                                                      | 6,049.71                                      |
| I9              | 3150                   | 246.15                                          | 325.54                               | 270.46                                                                        | 1,209.94                                      |
| I10             | 8100                   | 1,350.01                                        | 837.11                               | 695.46                                                                        | 3,111.28                                      |
| I11             | 2124                   | 190.73                                          | 219.51                               | 182.37                                                                        | 815.85                                        |
| I12             | 4536                   | 429.87                                          | 468.78                               | 389.46                                                                        | 1,742.32                                      |
| I13             | 4536                   | 429.87                                          | 468.78                               | 389.46                                                                        | 1,742.32                                      |
| I14             | 48600                  | 565.11                                          | 5022.69                              | 4,172.78                                                                      | 18,667.69                                     |
| I15             | 36000                  | 1,250.00                                        | 3720.51                              | 3,090.95                                                                      | 13,827.92                                     |
| I16             | 2070                   | 892.25                                          | 213.93                               | 177.73                                                                        | 795.11                                        |
| I17             | 8100                   | 686.52                                          | 837.11                               | 695.46                                                                        | 3,111.28                                      |
| I18             | 3600                   | 568.87                                          | 372.05                               | 309.09                                                                        | 1,382.79                                      |
| I19             | 9000                   | 417.57                                          | 930.13                               | 772.74                                                                        | 3,456.98                                      |
| I20             | 10800                  | 664.29                                          | 1116.15                              | 927.28                                                                        | 4,148.38                                      |
| I21             | 10800                  | 675.87                                          | 1116.15                              | 927.28                                                                        | 4,148.38                                      |
| I22             | 10800                  | 675.87                                          | 1116.15                              | 927.28                                                                        | 4,148.38                                      |
| I23             | 10800                  | 675.87                                          | 1116.15                              | 927.28                                                                        | 4,148.38                                      |
| I24             | 10800                  | 675.87                                          | 1116.15                              | 927.28                                                                        | 4,148.38                                      |
| I25             | 10800                  | 675.87                                          | 1116.15                              | 927.28                                                                        | 4,148.38                                      |
| I26             | 14400                  | 513.08                                          | 1488.20                              | 1,236.38                                                                      | 5,531.17                                      |
| I27             | 14400                  | 511.21                                          | 1488.20                              | 1,236.38                                                                      | 5,531.17                                      |
| I28             | 21150                  | 413.92                                          | 2185.80                              | 1,815.93                                                                      | 8,123.90                                      |
| I29             | 10530                  | 374.07                                          | 1088.25                              | 904.10                                                                        | 4,044.67                                      |
| I30             | 207                    | 92.07                                           | 21.39                                | 17.77                                                                         | 79.51                                         |
| I31             | 315                    | 506.97                                          | 32.55                                | 27.05                                                                         | 120.99                                        |
| I32             | 27000                  | 899.77                                          | 2790.38                              | 2,318.21                                                                      | 10,370.94                                     |
| Min             | 207                    | 92.07                                           | 21.39                                | 17.77                                                                         | 79.51                                         |
| Max             | 48600                  | 1,350.01                                        | 5022.69                              | 4,172.78                                                                      | 18,667.69                                     |
| I <sub>AV</sub> | <b>10670</b>           | <b>594.10</b>                                   | <b>1102.70</b>                       | <b>916.10</b>                                                                 | <b>4,098.36</b>                               |

**Table S2.** List of London data centres calculated mass flow rate of circulating air, the resulting volumetric flow rate of air available to a vertical farm at ideal temperatures, and the ideal size of the vertical farm depending on this flow rate.

| Code            | Waste heat energy<br>(kJ) | Waste heat<br>energy per<br>area<br>(J.m <sup>-2</sup> ) | mass flow rate<br>(kg.s <sup>-1</sup> ) | Volumetric flow rate<br>of air in data centre<br>(m <sup>3</sup> .s <sup>-1</sup> ) | Ideal size of<br>vertical farm<br>(m <sup>2</sup> ) |
|-----------------|---------------------------|----------------------------------------------------------|-----------------------------------------|-------------------------------------------------------------------------------------|-----------------------------------------------------|
| L1              | 6075                      | 1,089.85                                                 | 627.84                                  | 521.60                                                                              | 5,296.99                                            |
| L2              | 6075                      | 1,089.85                                                 | 627.84                                  | 521.60                                                                              | 5,296.99                                            |
| L3              | 1215                      | 217.97                                                   | 125.57                                  | 104.32                                                                              | 1,059.40                                            |
| L4              | 1350                      | 121.09                                                   | 139.52                                  | 115.91                                                                              | 1,177.11                                            |
| L5              | 1800                      | 734.68                                                   | 186.03                                  | 154.55                                                                              | 1,569.48                                            |
| L6              | 1125                      | 635.23                                                   | 116.27                                  | 96.59                                                                               | 980.92                                              |
| L7              | 5400                      | 609.14                                                   | 558.08                                  | 463.64                                                                              | 4,708.43                                            |
| L8              | 3600                      | 775.00                                                   | 372.05                                  | 309.09                                                                              | 3,138.96                                            |
| L9              | 1800                      | 968.75                                                   | 186.03                                  | 154.55                                                                              | 1,569.48                                            |
| L10             | 3600                      | 150.00                                                   | 372.05                                  | 309.09                                                                              | 3,138.96                                            |
| L11             | 243                       | 300.37                                                   | 25.11                                   | 20.86                                                                               | 211.88                                              |
| L12             | 1782                      | 456.93                                                   | 184.17                                  | 153.00                                                                              | 1,553.78                                            |
| L13             | 5400                      | 422.90                                                   | 558.08                                  | 463.64                                                                              | 4,708.43                                            |
| L14             | 9450                      | 358.70                                                   | 976.63                                  | 811.37                                                                              | 8,239.76                                            |
| L15             | 13050                     | 4,500.00                                                 | 1348.68                                 | 1,120.47                                                                            | 11,378.72                                           |
| L16             | 675                       | 807.29                                                   | 69.76                                   | 57.96                                                                               | 588.55                                              |
| L17             | 900                       | 605.47                                                   | 93.01                                   | 77.27                                                                               | 784.74                                              |
| L18             | 225                       | 40.36                                                    | 23.25                                   | 19.32                                                                               | 196.18                                              |
| L19             | 225                       | 220.17                                                   | 23.25                                   | 19.32                                                                               | 196.18                                              |
| L20             | 225                       | 24.22                                                    | 23.25                                   | 19.32                                                                               | 196.18                                              |
| L21             | 4725                      | 423.83                                                   | 488.32                                  | 405.69                                                                              | 4,119.88                                            |
| L22             | 6075                      | 984.71                                                   | 627.84                                  | 521.60                                                                              | 5,296.99                                            |
| L23             | 4500                      | 908.93                                                   | 465.06                                  | 386.37                                                                              | 3,923.70                                            |
| L24             | 4500                      | 908.93                                                   | 465.06                                  | 386.37                                                                              | 3,923.70                                            |
| L25             | 4320                      | 510.99                                                   | 446.46                                  | 370.91                                                                              | 3,766.75                                            |
| L26             | 4320                      | 51.10                                                    | 446.46                                  | 370.91                                                                              | 3,766.75                                            |
| L27             | 450                       | 231.60                                                   | 46.51                                   | 38.64                                                                               | 392.37                                              |
| Min             | 225                       | 24.22                                                    | 23.25                                   | 19.32                                                                               | 196.18                                              |
| Max             | 13050                     | 4,500.00                                                 | 1348.68                                 | 1,120.47                                                                            | 11,378.72                                           |
| L <sub>AV</sub> | <b>3448.33</b>            | <b>672.15</b>                                            | <b>356.38</b>                           | <b>296.07</b>                                                                       | <b>3,006.71</b>                                     |

**Table S3.** Irish [left] and London [right] based data centres' potential cooling effect of transpiration, and heating effect of the electronics of vertical farm contributing a net negative amount of energy, cooling the vertical farm to 15.19° C.

| Net energy savings of Irish data centres |                                      |                                                   |                     | Net energy savings of London-based data centres |                                      |                                                   |                     |
|------------------------------------------|--------------------------------------|---------------------------------------------------|---------------------|-------------------------------------------------|--------------------------------------|---------------------------------------------------|---------------------|
| Code                                     | Cooling energy of transpiration (kW) | Heating effect of vertical farm waste energy (kW) | Energy savings (kW) | Code                                            | Cooling energy of transpiration (kW) | Heating effect of vertical farm waste energy (kW) | Energy savings (kW) |
| I1                                       | 7,670.23                             | 571.20                                            | 355.12              | L1                                              | 6,715.88                             | 500.13                                            | 310.93              |
| I2                                       | 1,753.20                             | 130.56                                            | 81.17               | L2                                              | 6,715.88                             | 500.13                                            | 310.93              |
| I3                                       | 701.28                               | 52.22                                             | 32.47               | L3                                              | 1,343.18                             | 100.03                                            | 62.19               |
| I4                                       | 3,944.69                             | 293.76                                            | 182.63              | L4                                              | 1,492.42                             | 111.14                                            | 69.10               |
| I5                                       | 2,520.22                             | 187.68                                            | 116.68              | L5                                              | 1,989.89                             | 148.19                                            | 92.13               |
| I6                                       | 2,191.50                             | 163.20                                            | 101.46              | L6                                              | 1,243.68                             | 92.62                                             | 57.58               |
| I7                                       | 2,191.50                             | 163.20                                            | 101.46              | L7                                              | 5,969.67                             | 444.56                                            | 276.39              |
| I8                                       | 7,670.23                             | 571.20                                            | 355.12              | L8                                              | 3,979.78                             | 296.37                                            | 184.26              |
| I9                                       | 1,534.05                             | 114.24                                            | 71.02               | L9                                              | 1,989.89                             | 148.19                                            | 92.13               |
| I10                                      | 3,944.69                             | 293.76                                            | 182.63              | L10                                             | 3,979.78                             | 296.37                                            | 184.26              |
| I11                                      | 1,034.39                             | 77.03                                             | 47.89               | L11                                             | 268.64                               | 20.01                                             | 12.44               |
| I12                                      | 2,209.03                             | 164.51                                            | 102.27              | L12                                             | 1,969.99                             | 146.71                                            | 91.21               |
| I13                                      | 2,209.03                             | 164.51                                            | 102.27              | L13                                             | 5,969.67                             | 444.56                                            | 276.39              |
| I14                                      | 23,668.1                             | 1,762.57                                          | 1,095.79            | L14                                             | 10,446.9                             | 777.98                                            | 483.67              |
| I15                                      | 17,531.9                             | 1,305.60                                          | 811.70              | L15                                             | 14,426.7                             | 1,074.36                                          | 667.93              |
| I16                                      | 1,008.09                             | 75.07                                             | 46.67               | L16                                             | 746.21                               | 55.57                                             | 34.55               |
| I17                                      | 3,944.69                             | 293.76                                            | 182.63              | L17                                             | 994.94                               | 74.09                                             | 46.06               |
| I18                                      | 1,753.20                             | 130.56                                            | 81.17               | L18                                             | 248.74                               | 18.52                                             | 11.52               |
| I19                                      | 4,382.99                             | 326.40                                            | 202.92              | L19                                             | 248.74                               | 18.52                                             | 11.52               |
| I20-25                                   | 5,259.59                             | 391.68                                            | 243.51              | L20                                             | 248.74                               | 18.52                                             | 11.52               |
| I26                                      | 7,012.78                             | 522.24                                            | 324.68              | L21                                             | 5,223.46                             | 388.99                                            | 241.84              |
| I27                                      | 7,012.78                             | 522.24                                            | 324.68              | L22                                             | 6,715.88                             | 500.13                                            | 310.93              |
| I28                                      | 10,300.                              | 767.04                                            | 476.87              | L23                                             | 4,974.72                             | 370.47                                            | 230.32              |
| I29                                      | 5,128.10                             | 381.89                                            | 237.42              | L24                                             | 4,974.72                             | 370.47                                            | 230.32              |
| I30                                      | 100.81                               | 7.51                                              | 4.67                | L25                                             | 4,775.74                             | 355.65                                            | 221.11              |
| I31                                      | 153.40                               | 11.42                                             | 7.10                | L26                                             | 4,775.74                             | 355.65                                            | 221.11              |
| I32                                      | 13,148.9                             | 979.20                                            | 608.77              | L27                                             | 497.47                               | 37.05                                             | 23.03               |
| Min                                      | 100.81                               | 7.51                                              | 4.67                | Min                                             | 248.74                               | 18.52                                             | 11.52               |
| Max                                      | 23,668.1                             | 1,762.57                                          | 1,095.79            | Max                                             | 14,426.7                             | 1,074.36                                          | 667.93              |
| I <sub>AV</sub>                          | <b>5,196.17</b>                      | <b>386.96</b>                                     | <b>240.57</b>       | L <sub>AV</sub>                                 | <b>3,812.11</b>                      | <b>283.89</b>                                     | <b>176.49</b>       |

**Table S4.** Scenario 2 data for Irish data centres to predict ideal size of vertical farm.

| Code            | Usable waste heat energy (kJ) | Mass flow rate (kg.s <sup>-1</sup> ) | Mass flow rate of external air into vertical farm (kg.s <sup>-1</sup> ) | Volumetric flow rate of air into vertical farm (m <sup>3</sup> .s <sup>-1</sup> ) | Volumetric flow rate of air into vertical farm per square meter of data centre (m <sup>3</sup> .s <sup>-1</sup> .m <sup>-2</sup> ) | Ideal size of vertical farm (m <sup>2</sup> ) | Energy savings (kW) |
|-----------------|-------------------------------|--------------------------------------|-------------------------------------------------------------------------|-----------------------------------------------------------------------------------|------------------------------------------------------------------------------------------------------------------------------------|-----------------------------------------------|---------------------|
| I1              | 8663                          | 1627.72                              | 660.76                                                                  | 555.03                                                                            | 0.027                                                                                                                              | 1387.59                                       | 81.45               |
| I2              | 1980                          | 372.05                               | 151.03                                                                  | 126.86                                                                            | 0.011                                                                                                                              | 317.16                                        | 18.62               |
| I3              | 792                           | 148.82                               | 60.41                                                                   | 50.75                                                                             | 0.005                                                                                                                              | 126.86                                        | 7.45                |
| I4              | 4455                          | 837.11                               | 339.82                                                                  | 285.45                                                                            | 0.026                                                                                                                              | 713.62                                        | 41.89               |
| I5              | 2846                          | 534.82                               | 217.11                                                                  | 182.37                                                                            | 0.022                                                                                                                              | 455.92                                        | 26.76               |
| I6              | 2475                          | 465.06                               | 188.79                                                                  | 158.58                                                                            | 0.014                                                                                                                              | 396.45                                        | 23.27               |
| I7              | 2475                          | 465.06                               | 188.79                                                                  | 158.58                                                                            | 0.020                                                                                                                              | 396.45                                        | 23.27               |
| I8              | 8663                          | 1627.72                              | 660.76                                                                  | 555.03                                                                            | 0.039                                                                                                                              | 1387.59                                       | 81.45               |
| I9              | 1733                          | 325.54                               | 132.15                                                                  | 111.01                                                                            | 0.009                                                                                                                              | 277.52                                        | 16.29               |
| I10             | 4455                          | 837.11                               | 339.82                                                                  | 285.45                                                                            | 0.048                                                                                                                              | 713.62                                        | 41.89               |
| I11             | 1168                          | 219.51                               | 89.11                                                                   | 74.85                                                                             | 0.007                                                                                                                              | 187.13                                        | 10.98               |
| I12             | 2495                          | 468.78                               | 190.30                                                                  | 159.85                                                                            | 0.015                                                                                                                              | 399.62                                        | 23.46               |
| I13             | 2495                          | 468.78                               | 190.30                                                                  | 159.85                                                                            | 0.015                                                                                                                              | 399.62                                        | 23.46               |
| I14             | 26730                         | 5022.69                              | 2,038.90                                                                | 1,712.68                                                                          | 0.020                                                                                                                              | 4281.69                                       | 251.34              |
| I15             | 19800                         | 3720.51                              | 1,510.30                                                                | 1,268.65                                                                          | 0.044                                                                                                                              | 3171.62                                       | 186.17              |
| I16             | 1139                          | 213.93                               | 86.84                                                                   | 72.95                                                                             | 0.031                                                                                                                              | 182.37                                        | 10.71               |
| I17             | 4455                          | 837.11                               | 339.82                                                                  | 285.45                                                                            | 0.024                                                                                                                              | 713.62                                        | 41.89               |
| I18             | 1980                          | 372.05                               | 151.03                                                                  | 126.86                                                                            | 0.020                                                                                                                              | 317.16                                        | 18.62               |
| I19             | 4950                          | 930.13                               | 377.57                                                                  | 317.16                                                                            | 0.015                                                                                                                              | 792.91                                        | 46.54               |
| I20-25          | 5940                          | 1116.15                              | 453.09                                                                  | 380.59                                                                            | 0.023                                                                                                                              | 951.49                                        | 55.85               |
| I26             | 7920                          | 1488.20                              | 604.12                                                                  | 507.46                                                                            | 0.018                                                                                                                              | 1268.65                                       | 74.47               |
| I27             | 7920                          | 1488.20                              | 604.12                                                                  | 507.46                                                                            | 0.018                                                                                                                              | 1268.65                                       | 74.47               |
| I28             | 11633                         | 2185.80                              | 887.30                                                                  | 745.33                                                                            | 0.015                                                                                                                              | 1863.33                                       | 109.38              |
| I29             | 5792                          | 1088.25                              | 441.76                                                                  | 371.08                                                                            | 0.013                                                                                                                              | 927.70                                        | 54.46               |
| I30             | 114                           | 21.39                                | 8.68                                                                    | 7.29                                                                              | 0.003                                                                                                                              | 18.24                                         | 1.07                |
| I31             | 173                           | 32.55                                | 13.22                                                                   | 11.10                                                                             | 0.018                                                                                                                              | 27.75                                         | 1.63                |
| I32             | 14850                         | 2790.38                              | 1,132.72                                                                | 951.49                                                                            | 0.032                                                                                                                              | 2378.72                                       | 139.63              |
| Min             | 114                           | 21.39                                | 8.68                                                                    | 7.29                                                                              | 0.003                                                                                                                              | 18.24                                         | 1.07                |
| Max             | 26730                         | 5022.69                              | 2,038.90                                                                | 1,712.68                                                                          | 0.048                                                                                                                              | 4281.69                                       | 251.34              |
| I <sub>AV</sub> | <b>5868</b>                   | <b>1,102.70</b>                      | <b>447.626</b>                                                          | <b>376.01</b>                                                                     | <b>0.021</b>                                                                                                                       | <b>940.015</b>                                | <b>55.179</b>       |

**Table S5.** Scenario 2 data for London data centres to predict ideal size of vertical farm.

| Code            | Usable waste heat energy (kJ) | Mass flow rate (kg.s <sup>-1</sup> ) | Mass flow rate of external air into vertical farm (kg.s <sup>-1</sup> ) | Volumetric flow rate of air into vertical farm (m <sup>3</sup> .s <sup>-1</sup> ) | Volumetric flow rate of air into vertical farm per square meter of data centre (m <sup>3</sup> .s <sup>-1</sup> .m <sup>-2</sup> ) | Ideal size of vertical farm (m <sup>2</sup> ) | Energy savings (kW) |
|-----------------|-------------------------------|--------------------------------------|-------------------------------------------------------------------------|-----------------------------------------------------------------------------------|------------------------------------------------------------------------------------------------------------------------------------|-----------------------------------------------|---------------------|
| L1              | 3,341.25                      | 627.84                               | 988.54                                                                  | 830.37                                                                            | 0.149                                                                                                                              | 2075.92                                       | 121.86              |
| L2              | 3,341.25                      | 627.84                               | 988.54                                                                  | 830.37                                                                            | 0.149                                                                                                                              | 2075.92                                       | 121.86              |
| L3              | 668.25                        | 125.57                               | 197.71                                                                  | 166.07                                                                            | 0.030                                                                                                                              | 415.18                                        | 24.37               |
| L4              | 742.50                        | 139.52                               | 219.67                                                                  | 184.53                                                                            | 0.017                                                                                                                              | 461.32                                        | 27.08               |
| L5              | 990.00                        | 186.03                               | 292.90                                                                  | 246.04                                                                            | 0.100                                                                                                                              | 615.09                                        | 36.11               |
| L6              | 618.75                        | 116.27                               | 183.06                                                                  | 153.77                                                                            | 0.087                                                                                                                              | 384.43                                        | 22.57               |
| L7              | 2,970.00                      | 558.08                               | 878.70                                                                  | 738.11                                                                            | 0.083                                                                                                                              | 1845.27                                       | 108.32              |
| L8              | 1,980.00                      | 372.05                               | 585.80                                                                  | 492.07                                                                            | 0.106                                                                                                                              | 1230.18                                       | 72.21               |
| L9              | 990.00                        | 186.03                               | 292.90                                                                  | 246.04                                                                            | 0.132                                                                                                                              | 615.09                                        | 36.11               |
| L10             | 1,980.00                      | 372.05                               | 585.80                                                                  | 492.07                                                                            | 0.021                                                                                                                              | 1230.18                                       | 72.21               |
| L11             | 133.65                        | 25.11                                | 39.54                                                                   | 33.21                                                                             | 0.041                                                                                                                              | 83.04                                         | 4.87                |
| L12             | 980.10                        | 184.17                               | 289.97                                                                  | 243.58                                                                            | 0.062                                                                                                                              | 608.94                                        | 35.74               |
| L13             | 2,970.00                      | 558.08                               | 878.70                                                                  | 738.11                                                                            | 0.058                                                                                                                              | 1845.27                                       | 108.32              |
| L14             | 5,197.50                      | 976.63                               | 1,537.72                                                                | 1,291.69                                                                          | 0.049                                                                                                                              | 3229.22                                       | 189.55              |
| L15             | 7177.50                       | 1348.68                              | 2,123.52                                                                | 1,783.76                                                                          | 0.615                                                                                                                              | 4459.39                                       | 261.77              |
| L16             | 371.25                        | 69.76                                | 109.84                                                                  | 92.26                                                                             | 0.110                                                                                                                              | 230.66                                        | 13.54               |
| L17             | 495.00                        | 93.01                                | 146.45                                                                  | 123.02                                                                            | 0.083                                                                                                                              | 307.54                                        | 18.05               |
| L18             | 123.75                        | 23.25                                | 36.61                                                                   | 30.75                                                                             | 0.006                                                                                                                              | 76.89                                         | 4.51                |
| L19             | 123.75                        | 23.25                                | 36.61                                                                   | 30.75                                                                             | 0.030                                                                                                                              | 76.89                                         | 4.51                |
| L20             | 123.75                        | 23.25                                | 36.61                                                                   | 30.75                                                                             | 0.003                                                                                                                              | 76.89                                         | 4.51                |
| L21             | 2,598.75                      | 488.32                               | 768.86                                                                  | 645.84                                                                            | 0.058                                                                                                                              | 1614.61                                       | 94.78               |
| L22             | 3,341.25                      | 627.84                               | 988.54                                                                  | 830.37                                                                            | 0.135                                                                                                                              | 2075.92                                       | 121.86              |
| L23             | 2,475.00                      | 465.06                               | 732.25                                                                  | 615.09                                                                            | 0.124                                                                                                                              | 1537.72                                       | 90.26               |
| L24             | 2,475.00                      | 465.06                               | 732.25                                                                  | 615.09                                                                            | 0.124                                                                                                                              | 1537.72                                       | 90.26               |
| L25             | 2,376.00                      | 446.46                               | 702.96                                                                  | 590.49                                                                            | 0.070                                                                                                                              | 1476.21                                       | 86.65               |
| L26             | 2,376.00                      | 446.46                               | 702.96                                                                  | 590.49                                                                            | 0.007                                                                                                                              | 1476.21                                       | 86.65               |
| L27             | 247.50                        | 46.51                                | 73.22                                                                   | 61.51                                                                             | 0.032                                                                                                                              | 153.77                                        | 9.03                |
| Min             | 123.75                        | 23.25                                | 36.61                                                                   | 30.75                                                                             | 0.003                                                                                                                              | 76.89                                         | 4.51                |
| Max             | 7,177.50                      | 1,348.68                             | 2,123.52                                                                | 1,783.76                                                                          | 0.615                                                                                                                              | 4459.39                                       | 261.77              |
| L <sub>AV</sub> | <b>1,896.58</b>               | <b>356.38</b>                        | <b>561.12</b>                                                           | <b>471.34</b>                                                                     | <b>0.09</b>                                                                                                                        | <b>1178.35</b>                                | <b>69.17</b>        |

**Table S6.** The number of calories and portions of fruit or vegetables a vertical farm can provide compared to the same land area using traditional farming methods for Irish data centres in Scenario 1.

| Code            | People who<br>can obtain<br>daily calories<br>(Vertical<br>Farm) | People who<br>can obtain<br>daily calories<br>(Field) | People who<br>can obtain 7<br>portions of<br>fruit or veg<br>(Vertical<br>Farm) | People<br>who can<br>obtain 7<br>portions of<br>fruit or veg<br>(Field) |
|-----------------|------------------------------------------------------------------|-------------------------------------------------------|---------------------------------------------------------------------------------|-------------------------------------------------------------------------|
| I1              | 91                                                               | 29                                                    | 86                                                                              | 32                                                                      |
| I2              | 21                                                               | 7                                                     | 20                                                                              | 7                                                                       |
| I3              | 8                                                                | 3                                                     | 8                                                                               | 3                                                                       |
| I4              | 47                                                               | 15                                                    | 44                                                                              | 17                                                                      |
| I5              | 30                                                               | 9                                                     | 28                                                                              | 11                                                                      |
| I6              | 26                                                               | 8                                                     | 24                                                                              | 9                                                                       |
| I7              | 26                                                               | 8                                                     | 24                                                                              | 9                                                                       |
| I8              | 91                                                               | 29                                                    | 86                                                                              | 32                                                                      |
| I9              | 18                                                               | 6                                                     | 17                                                                              | 6                                                                       |
| I10             | 47                                                               | 15                                                    | 44                                                                              | 17                                                                      |
| I11             | 12                                                               | 4                                                     | 12                                                                              | 4                                                                       |
| I12             | 26                                                               | 8                                                     | 25                                                                              | 9                                                                       |
| I13             | 26                                                               | 8                                                     | 25                                                                              | 9                                                                       |
| I14             | 280                                                              | 88                                                    | 264                                                                             | 99                                                                      |
| I15             | 207                                                              | 65                                                    | 196                                                                             | 73                                                                      |
| I16             | 12                                                               | 4                                                     | 11                                                                              | 4                                                                       |
| I17             | 47                                                               | 15                                                    | 44                                                                              | 17                                                                      |
| I18             | 21                                                               | 7                                                     | 20                                                                              | 7                                                                       |
| I19             | 52                                                               | 16                                                    | 49                                                                              | 18                                                                      |
| I20-25          | 62                                                               | 20                                                    | 59                                                                              | 22                                                                      |
| I26             | 83                                                               | 26                                                    | 78                                                                              | 29                                                                      |
| I27             | 83                                                               | 26                                                    | 78                                                                              | 29                                                                      |
| I28             | 122                                                              | 38                                                    | 115                                                                             | 43                                                                      |
| I29             | 61                                                               | 19                                                    | 57                                                                              | 21                                                                      |
| I30             | 1                                                                | 0                                                     | 1                                                                               | 0                                                                       |
| I31             | 2                                                                | 1                                                     | 2                                                                               | 1                                                                       |
| I32             | 155                                                              | 49                                                    | 147                                                                             | 55                                                                      |
| Min             | 1                                                                | 0                                                     | 1                                                                               | 0                                                                       |
| Max             | 280                                                              | 88                                                    | 264                                                                             | 99                                                                      |
| I <sub>AV</sub> | <b>61</b>                                                        | <b>19</b>                                             | <b>58</b>                                                                       | <b>22</b>                                                               |

**Table S7.** The number of calories and portions of fruit or vegetables a vertical farm can provide compared to the same land area using traditional farming methods for London data centres in Scenario 1.

| Code            | People who<br>can obtain<br>daily calories<br>(Vertical<br>Farm) | People who<br>can obtain<br>daily calories<br>(Field) | People who<br>can obtain 7<br>portions of<br>fruit or veg<br>(Vertical<br>Farm) | People who<br>can obtain<br>7 portions<br>of fruit or<br>veg (Field) |
|-----------------|------------------------------------------------------------------|-------------------------------------------------------|---------------------------------------------------------------------------------|----------------------------------------------------------------------|
| L1              | 79                                                               | 25                                                    | 75                                                                              | 28                                                                   |
| L2              | 79                                                               | 25                                                    | 75                                                                              | 28                                                                   |
| L3              | 16                                                               | 5                                                     | 15                                                                              | 6                                                                    |
| L4              | 18                                                               | 6                                                     | 17                                                                              | 6                                                                    |
| L5              | 24                                                               | 7                                                     | 22                                                                              | 8                                                                    |
| L6              | 15                                                               | 5                                                     | 14                                                                              | 5                                                                    |
| L7              | 71                                                               | 22                                                    | 67                                                                              | 25                                                                   |
| L8              | 47                                                               | 15                                                    | 44                                                                              | 17                                                                   |
| L9              | 24                                                               | 7                                                     | 22                                                                              | 8                                                                    |
| L10             | 47                                                               | 15                                                    | 44                                                                              | 17                                                                   |
| L11             | 3                                                                | 1                                                     | 3                                                                               | 1                                                                    |
| L12             | 23                                                               | 7                                                     | 22                                                                              | 8                                                                    |
| L13             | 71                                                               | 22                                                    | 67                                                                              | 25                                                                   |
| L14             | 124                                                              | 39                                                    | 117                                                                             | 44                                                                   |
| L15             | 171                                                              | 54                                                    | 161                                                                             | 60                                                                   |
| L16             | 9                                                                | 3                                                     | 8                                                                               | 3                                                                    |
| L17             | 12                                                               | 4                                                     | 11                                                                              | 4                                                                    |
| L18             | 3                                                                | 1                                                     | 3                                                                               | 1                                                                    |
| L19             | 3                                                                | 1                                                     | 3                                                                               | 1                                                                    |
| L20             | 3                                                                | 1                                                     | 3                                                                               | 1                                                                    |
| L21             | 62                                                               | 19                                                    | 58                                                                              | 22                                                                   |
| L22             | 79                                                               | 25                                                    | 75                                                                              | 28                                                                   |
| L23             | 59                                                               | 19                                                    | 56                                                                              | 21                                                                   |
| L24             | 59                                                               | 19                                                    | 56                                                                              | 21                                                                   |
| L25             | 56                                                               | 18                                                    | 53                                                                              | 20                                                                   |
| L26             | 56                                                               | 18                                                    | 53                                                                              | 20                                                                   |
| L27             | 6                                                                | 2                                                     | 6                                                                               | 2                                                                    |
| Min             | 3                                                                | 1                                                     | 3                                                                               | 1                                                                    |
| Max             | 171                                                              | 54                                                    | 161                                                                             | 60                                                                   |
| L <sub>AV</sub> | <b>45</b>                                                        | <b>14</b>                                             | <b>43</b>                                                                       | <b>16</b>                                                            |

**Table S8.** The number of calories and portions of fruit or vegetables a vertical farm can provide compared to the same land area using traditional farming methods for Irish data centres in Scenario 2.

| Code            | People who<br>can obtain<br>daily calories<br>(Vertical<br>Farm) | People who<br>can obtain<br>daily calories<br>(Field) | People who<br>can obtain 7<br>portions of<br>fruit or veg<br>(Vertical<br>Farm) | People who<br>can obtain<br>7 portions<br>of fruit or<br>veg (Field) |
|-----------------|------------------------------------------------------------------|-------------------------------------------------------|---------------------------------------------------------------------------------|----------------------------------------------------------------------|
| I1              | 21                                                               | 7                                                     | 20                                                                              | 7                                                                    |
| I2              | 5                                                                | 1                                                     | 4                                                                               | 2                                                                    |
| I3              | 2                                                                | 1                                                     | 2                                                                               | 1                                                                    |
| I4              | 11                                                               | 3                                                     | 10                                                                              | 4                                                                    |
| I5              | 7                                                                | 2                                                     | 6                                                                               | 2                                                                    |
| I6              | 6                                                                | 2                                                     | 6                                                                               | 2                                                                    |
| I7              | 6                                                                | 2                                                     | 6                                                                               | 2                                                                    |
| I8              | 21                                                               | 7                                                     | 20                                                                              | 7                                                                    |
| I9              | 4                                                                | 1                                                     | 4                                                                               | 1                                                                    |
| I10             | 11                                                               | 3                                                     | 10                                                                              | 4                                                                    |
| I11             | 3                                                                | 1                                                     | 3                                                                               | 1                                                                    |
| I12             | 6                                                                | 2                                                     | 6                                                                               | 2                                                                    |
| I13             | 6                                                                | 2                                                     | 6                                                                               | 2                                                                    |
| I14             | 64                                                               | 20                                                    | 61                                                                              | 23                                                                   |
| I15             | 48                                                               | 15                                                    | 45                                                                              | 17                                                                   |
| I16             | 3                                                                | 1                                                     | 3                                                                               | 1                                                                    |
| I17             | 11                                                               | 3                                                     | 10                                                                              | 4                                                                    |
| I18             | 5                                                                | 1                                                     | 4                                                                               | 2                                                                    |
| I19             | 12                                                               | 4                                                     | 11                                                                              | 4                                                                    |
| I20-25          | 14                                                               | 4                                                     | 13                                                                              | 5                                                                    |
| I26             | 19                                                               | 6                                                     | 18                                                                              | 7                                                                    |
| I27             | 19                                                               | 6                                                     | 18                                                                              | 7                                                                    |
| I28             | 28                                                               | 9                                                     | 26                                                                              | 10                                                                   |
| I29             | 14                                                               | 4                                                     | 13                                                                              | 5                                                                    |
| I30             | 0                                                                | 0                                                     | 0                                                                               | 0                                                                    |
| I31             | 0                                                                | 0                                                     | 0                                                                               | 0                                                                    |
| I32             | 36                                                               | 11                                                    | 34                                                                              | 13                                                                   |
| Min             | 0                                                                | 0                                                     | 0                                                                               | 0                                                                    |
| Max             | 64                                                               | 20                                                    | 61                                                                              | 23                                                                   |
| I <sub>AV</sub> | <b>14</b>                                                        | <b>4</b>                                              | <b>13</b>                                                                       | <b>5</b>                                                             |



**Table S9.** The number of calories and portions of fruit or vegetables a vertical farm can provide compared to the same land area using traditional farming methods for London data centres in Scenario 2.

| Code | People who<br>can obtain<br>daily calories<br>(Vertical<br>Farm) | People who<br>can obtain<br>daily calories<br>(Field) | People who<br>can obtain 7<br>portions of<br>fruit or veg<br>(Vertical<br>Farm) | People who<br>can obtain<br>7 portions<br>of fruit or<br>veg (Field) |
|------|------------------------------------------------------------------|-------------------------------------------------------|---------------------------------------------------------------------------------|----------------------------------------------------------------------|
| L1   | 31                                                               | 10                                                    | 29                                                                              | 11                                                                   |
| L2   | 31                                                               | 10                                                    | 29                                                                              | 11                                                                   |
| L3   | 6                                                                | 2                                                     | 6                                                                               | 2                                                                    |
| L4   | 7                                                                | 2                                                     | 7                                                                               | 2                                                                    |
| L5   | 9                                                                | 3                                                     | 9                                                                               | 3                                                                    |
| L6   | 6                                                                | 2                                                     | 5                                                                               | 2                                                                    |
| L7   | 28                                                               | 9                                                     | 26                                                                              | 10                                                                   |
| L8   | 18                                                               | 6                                                     | 17                                                                              | 7                                                                    |
| L9   | 9                                                                | 3                                                     | 9                                                                               | 3                                                                    |
| L10  | 18                                                               | 6                                                     | 17                                                                              | 7                                                                    |
| L11  | 1                                                                | 0                                                     | 1                                                                               | 0                                                                    |
| L12  | 9                                                                | 3                                                     | 9                                                                               | 3                                                                    |
| L13  | 28                                                               | 9                                                     | 26                                                                              | 10                                                                   |
| L14  | 48                                                               | 15                                                    | 46                                                                              | 17                                                                   |
| L15  | 67                                                               | 21                                                    | 63                                                                              | 24                                                                   |
| L16  | 3                                                                | 1                                                     | 3                                                                               | 1                                                                    |
| L17  | 5                                                                | 1                                                     | 4                                                                               | 2                                                                    |
| L18  | 1                                                                | 0                                                     | 1                                                                               | 0                                                                    |
| L19  | 1                                                                | 0                                                     | 1                                                                               | 0                                                                    |
| L20  | 1                                                                | 0                                                     | 1                                                                               | 0                                                                    |
| L21  | 24                                                               | 8                                                     | 23                                                                              | 9                                                                    |
| L22  | 31                                                               | 10                                                    | 29                                                                              | 11                                                                   |
| L23  | 23                                                               | 7                                                     | 22                                                                              | 8                                                                    |
| L24  | 23                                                               | 7                                                     | 22                                                                              | 8                                                                    |
| L25  | 22                                                               | 7                                                     | 21                                                                              | 8                                                                    |
| L26  | 22                                                               | 7                                                     | 21                                                                              | 8                                                                    |
| L27  | 2                                                                | 1                                                     | 2                                                                               | 1                                                                    |
| Min  | 1                                                                | 0                                                     | 1                                                                               | 0                                                                    |
| Max  | 67                                                               | 21                                                    | 63                                                                              | 24                                                                   |
| LAV  | <b>18</b>                                                        | <b>6</b>                                              | <b>17</b>                                                                       | <b>6</b>                                                             |
